# Supplementary material for: An integrated multi-tissue atlas of epigenomic landscapes and regulatory elements in the bovine genome
Source: Research Square preprint supplement (doi:10.21203/rs.3.rs-7810677/v1), 2025-10-30
Supplement: Supplementary file 2 [file 8e9c2e37ac08c9e14ecf7253.pdf]

## **The list of supplementary Tables**

**Table S1.** Sequencing quality metrics of transcriptomic sequencing (RNA-seq) data

**Table S2.** Sequencing quality metrics of Assay for Transposase-Accessible Chromatin (ATAC) using sequencing data

**Table S3.** Sequencing quality metrics of whole genome bisulfite sequencing (WGBS) data

**Table S4.** Sequencing quality metrics of chromatin immunoprecipitation sequencing (ChIP-seq) data

**Table S5.** Sequencing quality metrics of high-throughput chromosome conformation capture (Hi-C) data

**Table S6.** The list of tissue-specific chromatin states

**Table S7.** Functional enrichment of tissue-specific active enhancers (EnhA) via rGREAT

**Table S8.** Motif enrichment of tissue-specific active enhancers (EnhA) via HOMER

**Table S9.** Identification of development state-specific chromatin states

**Table S10.** Functional enrichment of development state-specific chromatin states via rGREAT

**Table S11.** The list of differentially methylated regions comparing a target tissue with the others via wgbs\_tools

**Table S12.** Functional enrichment of tissue-specific differentially methylated regions

**Table S13.** Motif enrichment of tissue-specific unmethylated regions

**Table S14.** Performance metrics of ChromBPNet models across tissue contexts

**Table S15.** The list of SNPs showing allele-specific effects on epigenomic activity

**Table S16.** The list of allele-specific regulatory variants identified in this study overlapping trait QTLs curated in CattleQTLdb<sup>1</sup> (last accessed on March 18, 2025)

**Table S17.** GWAS fine-mapping results using regulatory magnitude as prior weight.

**Table S18.** GWAS summary statistics used in comparative analyses
